# Supplementary material for: Genetic screening and molecular characterization of MET alterations in non-small cell lung cancer
Source: Springer Nature journal article supplement (doi:10.1007/s12094-017-1799-7), 2017-11-14
Supplement: MOESM1 [file 15223686]

## Sheet: Hoja1
Supplementary Table 1. Sequence of primers used for screening the METex14-skipping mutations and the copy number by real-time quantitative PCR and size of amplified products.
Primer pairs used to amplify exon 14 of MET in the genomic DNA (MET) and at the cDNA (cMET)
Primer name	Target	Sequence (5' - 3')	Product length (bp)
MET 14F	MET exon 14	ATTGTCGTCGATTCTTGTGTGC	414
MET 14R		GTCAAATACTTACTTGGCAGAGG
cMET 14F	cMET exon 14	AGCAAATTAAAGATCTGGGCAGT	154
cMET 14R		TCTTCTGGAAAAGTAGCTCGGT
cMET 13_15F	cMET exons 13_15	TCAACCGTCCTTGGAAAAGT	423
cMET 13_15R		AGCACTGAGGTCAATGTGGA
Primer pairs used to determine MET copy number (qPCR)
Primer name	Target	Sequence (5' - 3')	Product length (bp)
MET 16F	MET exon 16	GGGCATTTTGGTTGTGTAT	200
MET 16R		GTGGTAGCTGATTTTTCCACAAGG
ACTB F	ACTB	GTGCTCAGGGCTTCTTGTCC	126
ACTB R		GCTCGATGGGGTACTTCAGG
